# Supplementary material
Source: Springer Nature journal article supplement (https://www.springermedizin.de/resource/supplementary/12967_2012_1506_MOESM8_ESM.pdf/9574214)

Figure 3b. Dendritic cell-activated CD3<sup>-</sup>CD4<sup>+</sup> T-cells produce less IL-5 in presence of eosinophils.

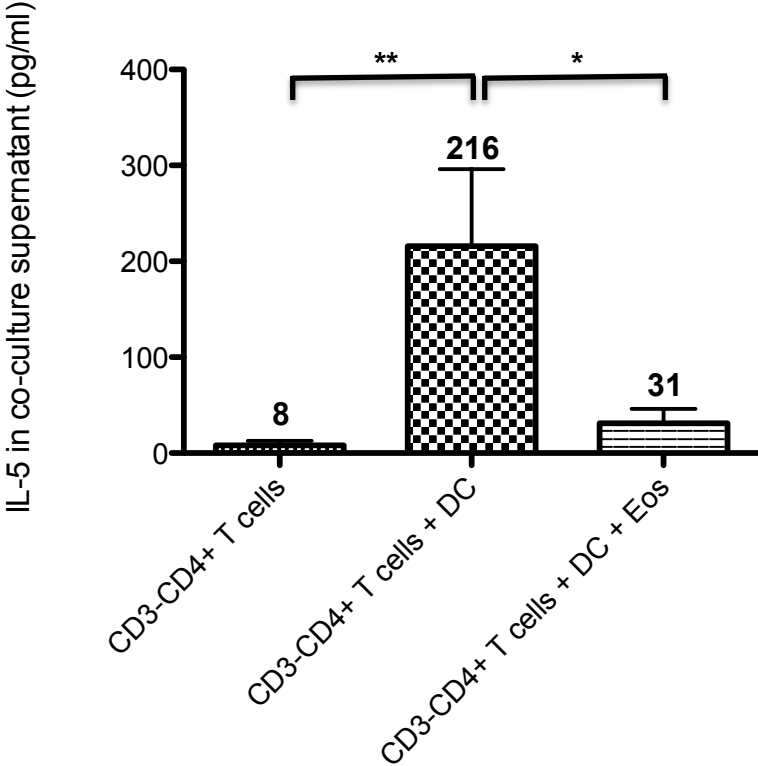

Supplement: MOESM8 [file 9574214]
